# Supplementary material for: Characterising resuscitation promoting factor fluorescent-fusions in mycobacteria
Source: PubMed Central journal article supplement (PMC5898023; doi:10.1186/s12866-018-1165-0), 2018-04-12
Supplement: 12866_2018_1165_MOESM6_ESM.pdf [file 12866_2018_1165_MOESM6_ESM.pdf]

**Additional Table 2.** Primers used in this study

| Primer        | Sequence (5'-3')                                          | Use                                                                                                                                      |
|---------------|-----------------------------------------------------------|------------------------------------------------------------------------------------------------------------------------------------------|
| mCherry R     | cctcgatctcgaactcgtgg                                      | Sequencing inserts in pMEND-mCherry. Reverse primer                                                                                      |
| pMIND MCS F   | gctctcggtaagcacgtcg                                       | Sequencing inserts in pMEND-mCherry. Forward primer                                                                                      |
| pST R         | cgtaggtcagggtggtcacg                                      | Sequencing inserts cloned in EcoR I site of pSTetRO- <i>egfp</i> . Reverse primer                                                        |
| RpfA F cherry | <u>ctagggatccaggaggtgatgagcatgagtgacgccac</u><br>cgtaag   | Amplifying and cloning <i>rpfA</i> gene from <i>M. tuberculosis</i> into pMEND-mCherry (fusion to the N-terminus of <i>mcherry</i> )     |
| RpfA R cherry | ctagcatatggccgatgactacggctgtg                             | As above                                                                                                                                 |
| RpfB F cherry | <u>ctagggatccaggaggtgatgagcatgttcgcctgtag</u><br>tcgg     | Amplifying and cloning <i>rpfB</i> gene from <i>M. tuberculosis</i> into pMEND-mCherry (fusion to the N-terminus of <i>mcherry</i> )     |
| RpfB R cherry | ctagcatatggcgcgaccccgctcgtgcag                            | As above                                                                                                                                 |
| RpfC F cherry | <u>ctagggatccaggaggtgatgagcgtgcatcctttgccg</u><br>ccgac   | Amplifying and cloning <i>rpfC</i> gene from <i>M. tuberculosis</i> into pMEND-mCherry (fusion to the N-terminus of <i>mcherry</i> )     |
| RpfC R cherry | ctagcatatggcgcggaataacttgcctgaatg                         | As above                                                                                                                                 |
| RpfD F cherry | <u>ctagggatccaggaggtgatgagcatgacaccgggttg</u><br>cttactac | Amplifying and cloning <i>rpfD</i> gene from <i>M. tuberculosis</i> into pMEND-mCherry (fusion to the N-terminus of <i>mcherry</i> )     |
| RpfD R cherry | ctagcatatgatcgtccctgctccccgaac                            | As above                                                                                                                                 |
| RpfE F cherry | <u>ctagggatccaggaggtgatgagcatcccgtgggttg</u><br>ctttgg    | Amplifying and cloning <i>rpfE</i> gene from <i>M. tuberculosis</i> into pMEND-mCherry (fusion to the N-terminus of <i>mcherry</i> )     |
| RpfE R cherry | ctagcatatggcgcgcccgcgcccagac                              | As above                                                                                                                                 |
| RpfA F egfp   | ctaggaattcatgagtgacccaccgtaag                             | Amplifying and cloning <i>rpfA</i> gene from <i>M. tuberculosis</i> into pSTetRO- <i>egfp</i> (fusion to the N-terminus of <i>egfp</i> ) |
| RpfA R egfp   | ctaggaattcggccgatgactacggctgtg                            | As above                                                                                                                                 |
| RpfB F egfp   | ctaggaattcatgttcgcctggtagtcgg                             | Amplifying and cloning <i>rpfB</i> gene from <i>M. tuberculosis</i> into pSTetRO- <i>egfp</i> (fusion to the N-terminus of <i>egfp</i> ) |
| RpfB R egfp   | ctaggaattcgcgcgaccccgctcgtgcag                            | As above                                                                                                                                 |
| RpfC F egfp   | ctaggaattcgtgcatcctttgccggccgac                           | Amplifying and cloning <i>rpfC</i> gene from <i>M. tuberculosis</i> into pSTetRO- <i>egfp</i> (fusion to the N-terminus of <i>egfp</i> ) |
| RpfC R egfp   | ctaggaattcgcgcggaataacttgcctgaatg                         | As above                                                                                                                                 |
| RpfD F egfp   | ctaggaattcatgacaccgggttgcttactactgc                       | Amplifying and cloning <i>rpfD</i> gene from <i>M. tuberculosis</i> into pSTetRO- <i>egfp</i> (fusion to the N-terminus of <i>egfp</i> ) |
| RpfD R egfp   | ctaggaattcatgctccctgctccccgaac                            | As above                                                                                                                                 |
| RpfE F egfp   | ctaggaattcatgcccgtgggttgctttg                             | Amplifying and cloning <i>rpfE</i> gene from <i>M. tuberculosis</i> into pSTetRO- <i>egfp</i> (fusion to the N-terminus of <i>egfp</i> ) |
| RpfE R egfp   | ctaggaattcggcgcgcccgcgcccagac                             | As above                                                                                                                                 |
| TetRO F       | ctagggatcctaagtcattaaagttgactttatcatcgataa<br>ctttatc     | Amplifying TetRO promoter region from pMEND and cloning in BamHI-EcoRI sites of pST5552                                                  |
| TetRO R       | ctaggaattcacctccttaggtcagtcaggattccacgatg<br>ag           | As above                                                                                                                                 |

Restriction sites are underlined.
